# Supplementary material for: Urchin-like hierarchical spheres of FeSe2 embedded in a TiN/C composite covered by CNTs as anodes for sodium-ion storage
Source: Royal Society of Chemistry journal article supplement (doi:10.1039/d4ce00284a), 2024-01-01
Supplement: d4ce00284a1.pdf [file d4ce00284a1.pdf]

## Supplementary Information

# Urchin-like hierarchical spheres of FeSe<sub>2</sub> embedded in TiN/C composite covered by CNTs as anodes for sodium-ion storage

Ling Wang\*, Miaoling Hu, Changzheng Lin, Wei Yan\*

Xi'an Key Laboratory of Solid Waste Recycling and Resource Recovery, Department  
of Environmental Science & Engineering, Xi'an Jiaotong University, Xi'an 710049,  
China

Corresponding author: Email: yanwei@xjtu.edu.cn (Wei Yan); lingwang@xjtu.edu.cn  
(Ling Wang)

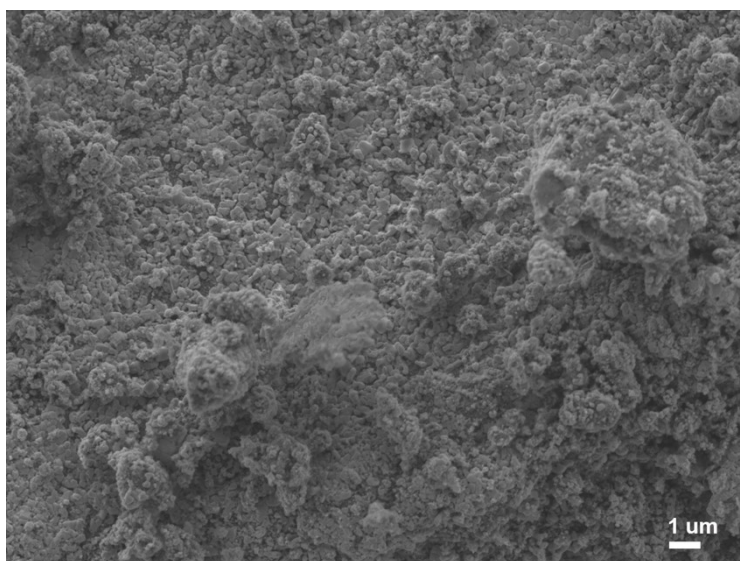

Fig.S1 SEM image of FeSe<sub>2</sub>@Ti/C

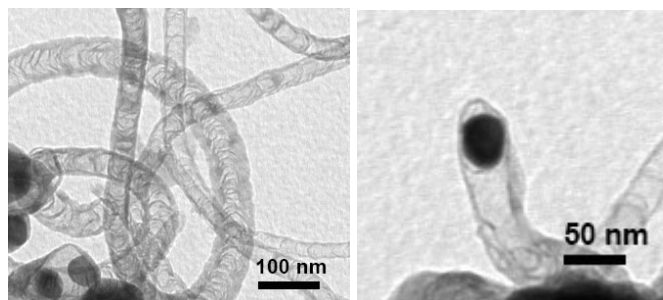

Fig.S2 TEM image of CNTs on the surface of FeSe<sub>2</sub>@TiN/C@CNTs

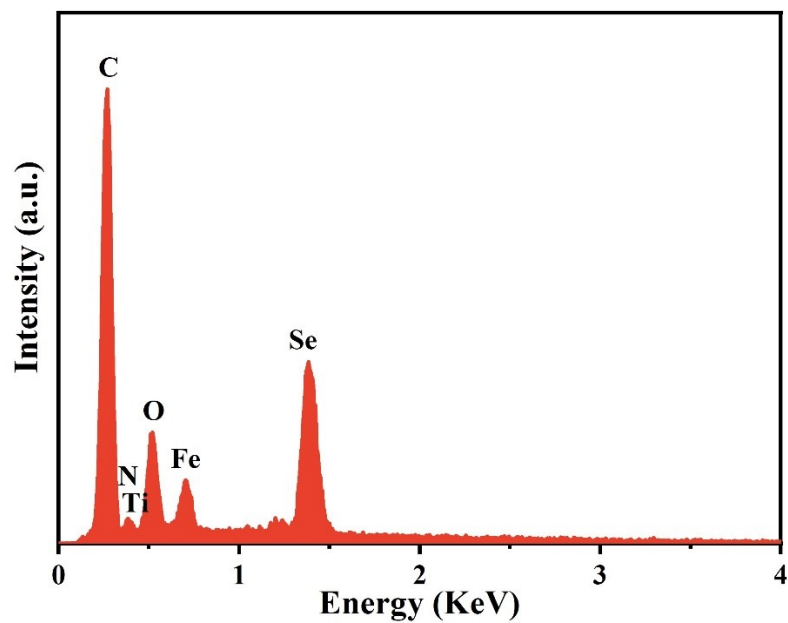

Fig.S3 Energy dispersive spectrometer result of FeSe<sub>2</sub>@TiN/C@CNTs

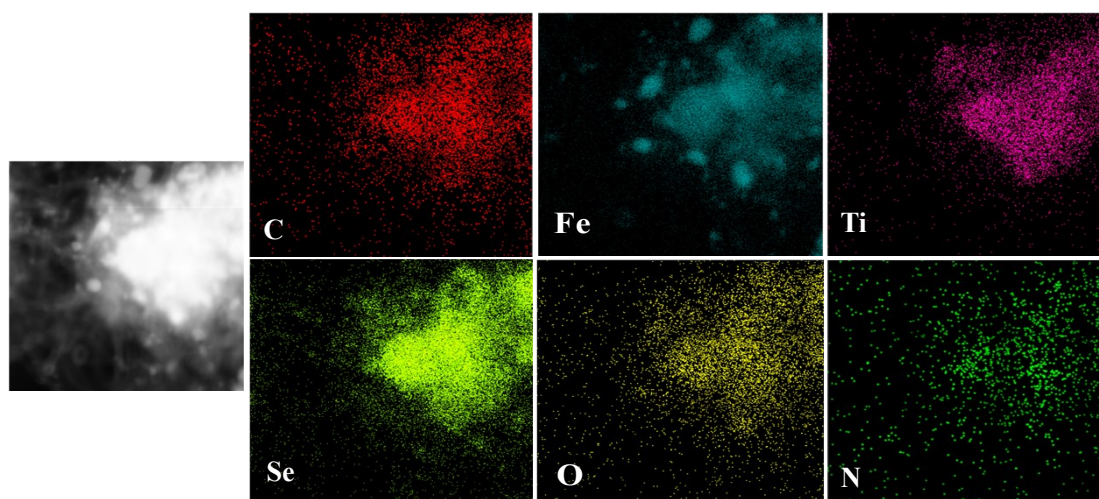

Fig.S4 Elemental mapping images of FeSe<sub>2</sub>@TiN/C@CNTs



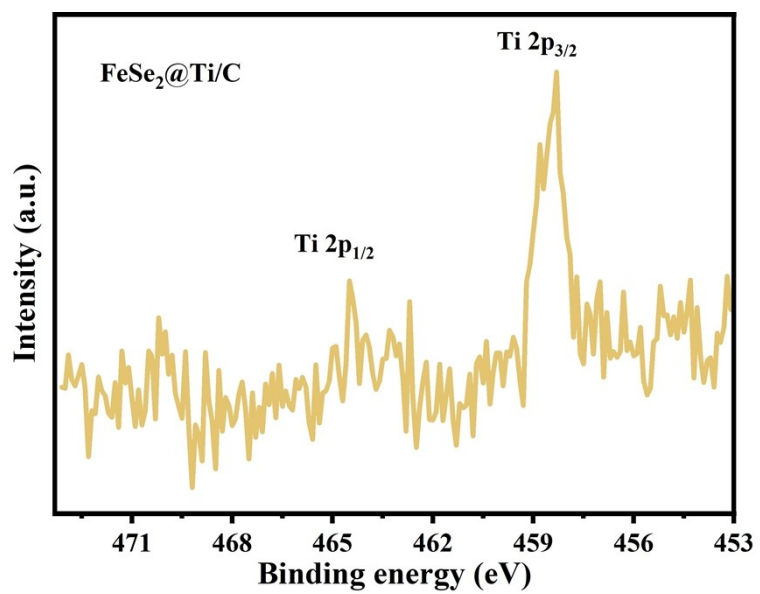

Fig.S7 Ti 2p high-resolution XPS spectrum of FeSe<sub>2</sub>@Ti/C

Table S1 Electrochemical properties of various FeSe<sub>2</sub>-based SIBs anodes reported before.

| <b>Materials</b>                    | <b>Current rate<br/>(A g<sup>-1</sup>)</b> | <b>Capacity<br/>(mAh g<sup>-1</sup>)</b> | <b>Cycle<br/>number</b> | <b>Ref.</b>  |
|-------------------------------------|--------------------------------------------|------------------------------------------|-------------------------|--------------|
| FeSe <sub>2</sub> @TiN/C@CNTs       | 0.2                                        | 343.5                                    | 1000                    | This<br>work |
| FeSe <sub>2</sub> -10               | 1                                          | 325                                      | 100                     | S1           |
| FeS <sub>2</sub> @FeSe <sub>2</sub> | 1                                          | 350                                      | 2700                    | S2           |
| FeSe <sub>2</sub> /NC@G             | 2                                          | 323                                      | 1000                    | S3           |
| FeSe <sub>2</sub> @C                | 1                                          | 359                                      | 200                     | S4           |
| CNT/FeSe <sub>2</sub> /C            | 0.1                                        | 546                                      | 100                     | S5           |
| FeSe <sub>2</sub> @C MFs            | 0.05                                       | 461                                      | 100                     | S6           |
| FeSe <sub>2</sub> @TNCF/CNTs        | 0.2                                        | 388.5                                    | 1000                    | S7           |
| FeSe <sub>2</sub> @NC               | 1                                          | 327.6                                    | 600                     | S8           |
| FeSe <sub>2</sub> /C                | 10                                         | 412                                      | 1000                    | S9           |
| FeSe <sub>2</sub> @rGO              | 5                                          | 350                                      | 600                     | S10          |
| FeSe <sub>2</sub> @NC               | 1                                          | 269.8                                    | 500                     | S11          |
| FeSe <sub>2</sub> -AC-30            | 0.5                                        | 375                                      | 150                     | S12          |
| FeSe <sub>2</sub> @C/NG             | 0.5                                        | 411                                      | 100                     | S13          |
| O-FeSe <sub>2</sub> NSs             | 0.1                                        | 331                                      | 100                     | S14          |

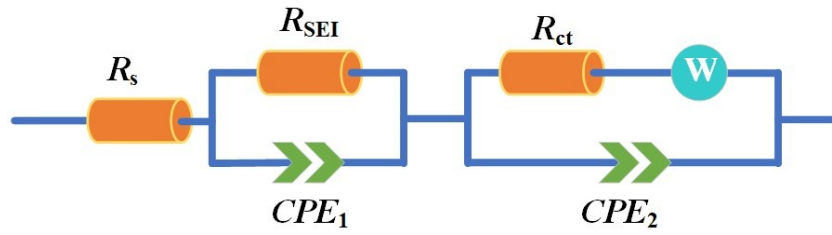

Fig.S8 The equivalent circuit model

Table S2 EIS fitting results

| Sample                        | $R_s/\Omega$ | $R_{SEI}/\Omega$  | $R_{ct}/\Omega$ | $CPE_1/\Omega^{-1} s^n$ | $CPE_2/\Omega^{-1} s^n$ |
|-------------------------------|--------------|-------------------|-----------------|-------------------------|-------------------------|
| FeSe <sub>2</sub> @TiN/C@CNTs | 0.93         | $4.3 \times 10^6$ | 133.0           | 0.0015                  | $1.9 \times 10^{-4}$    |
| FeSe <sub>2</sub> @Ti/C       | 3.39         | $4.0 \times 10^9$ | 204.3           | 0.0012                  | $4.2 \times 10^{-5}$    |

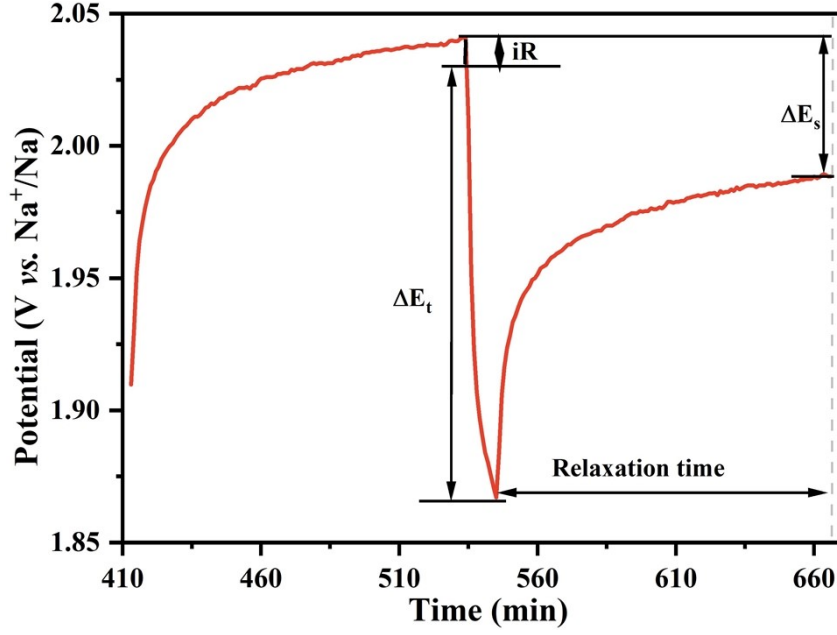

Fig.S9 Detailed potential response during a single current pulse with time of  
FeSe<sub>2</sub>@TiN/C@CNTs electrode

On GITT test, the  $D_{Na^+}$  values could be calculated by the following equation<sup>S8, S15</sup>:

$$D_{Na^+} = \frac{4}{\pi\tau} \left( \frac{mV_m}{MA} \right)^2 \left( \frac{\Delta E_s}{\Delta E_t} \right)^2 \left( \tau = \frac{L^2}{D_{Na^+}} \right) \quad (S1)$$

Where  $\tau$  is the relaxation time,  $m$ ,  $M$  and  $V_m$  are the mass of the sample, the molar mass of the sample, the molar volume of the sample,  $A$  is the total area of the electrode,  $\Delta E_s$  is the voltage change caused by a pulse, and  $\Delta E_t$  are the total change of the cell voltage during a constant pulse time, respectively.  $L$  is the thickness of the electrode.



## Reference

- S1 Z. H. Zeng, J. C. Liu, Z. Q. Yuan, Y. Dong, W. Q. Zhao, S. H. Yuan, S. Y. Xie, M. J. Jing, T. J. Wu and P. Ge, *J. Colloid Interface Sci.*, 2023, **648**, 149-160.
- S2 W. X. Zhao, C. X. Guo and C. M. Li, *J. Mater. Chem. A*, 2017, **5**, 19195-19202.
- S3 S. K. Jiang, M. J. Xiang, J. Y. Zhang, S. Q. Chu, A. Marcelli, W. S. Chu, D. J. Wu, B. Qian, S. Tao and L. Song, *Nanoscale*, 2020, **12**, 22210-22216.
- S4 T. X. Wang, W. T. Guo, G. Wang, H. Wang, J. T. Bai and B. B. Wang, *J. Alloys Compd.*, 2020, **834**, 155265.
- S5 M. Yousaf, Z. P. Wang, Y. S. Wang, Y. J. Chen, U. Ali, M. Maqbool, A. Imran, N. Mahmood, P. Gao and R. P. S. Han, *Small*, 2020, **16**, 2002200.
- S6 S. J. Dong, Q. M. Su, W. C. Jiao, S. K. Ding, M. Zhang, G. H. Du and B. S. Xu, *J. Alloys Compd.*, 2020, **842**, 155888.
- S7 L. Wang, M. L. Hu, C. Z. Lin and W. Yan, *J. Electroanal. Chem.*, 2023, **950**, 117906.
- S8 Q. Y. Ma, L. Zhang, Y. Ding, X. Shi, Y. L. Ding, J. Mujtaba, Z. Y. Li and Z. Fang, *J. Colloid Interface Sci.*, 2022, **622**, 840-848.
- S9 X. C. Kang, G. X. Xu, H. Yin, Y. L. Zhao, J. M. Zhang and J. Tang, *Mater. Lett.*, 2024, **362**, 136051.
- S10 Y. W. Zhang, Y. K. Wu, W. Zhong, F. Y. Xiao, M. Kashif Aslam, X. Zhang and M. W. Xu, *ChemSusChem*, 2021, **14**, 1336-1343.
- S11 J. M. Jiang, Y. Jiang, Z. Y. Chen, C. Tang, Y. X. Cheng, Q. C. Zhuang and Z. C. Ju, *Mater. Lett.*, 2023, **352**, 135092.

- S12 G. D. Park, J. H. Kim and Y. C. Kang, *Mater. Charact.*, 2016, **120**, 349-356.
- S13 S. H. Yang, S. K. Park and Y. C. Kang, *Int. J. Energ. Res.*, 2021, **45**, 20909-20920.
- S14 Z. Q. Wang, B. Zeng, D. Zhou, L. Tai, X. D. Liu and W.-M. Lau, *Chem. Eng. J.*, 2022, **428**, 132637.
- S15 Y. C. Tang, Z. B. Zhao, X. J. Hao, Y. Wei, H. Zhang, Y. F. Dong, Y. W. Wang, X. Pan, Y. N. Hou, X. Z. Wang and J. S. Qiu, *J. Mater. Chem. A*, 2019, **7**, 4469-4479.
